# Supplementary material for: Risk of Abdominal Obesity Associated with Phthalate Exposure of Nurses
Source: MDPI journal article supplement (doi:10.3390/toxics10030143), 2022-03-18
Supplement: s1 [file s1]

# Supplementary Materials: Risk of Abdominal Obesity Associated with Phthalate Exposure of Nurses

Branislav Kolena, Henrieta Hlisníková, Ľubica Kečkéšová, Miroslava Šidlovská, Tomáš Trnovec, And Ida Petrovičová

**Table S1.** Associations between phthalate metabolites on the anthropometric parameters adjusted to consumer behavior and consumer practices.

| metabolite | Anthropometric parameter |             |             |             |             |             |             |       |             |             |       |             |        |       |             |           |             |             |
|------------|--------------------------|-------------|-------------|-------------|-------------|-------------|-------------|-------|-------------|-------------|-------|-------------|--------|-------|-------------|-----------|-------------|-------------|
|            |                          | BMI         | HC          | WC          | WHR         | WHtR        | FMI         | FFMI  | VF          | ABSI        | HI    | z BMI       | z ABSI | z HI  | BMI risk    | ABSI risk | HI risk     | ARI risk    |
| MMP        | r                        | -,041       | -,041       | -,101       | -,107       | -,020       | -,214       | ,294  | -,163       | ,002        | ,146  | -,074       | -,154  | ,166  | ,032        | -,174     | -,121       | -,101       |
|            | p                        | ,825        | ,825        | ,590        | ,565        | ,915        | ,249        | ,108  | ,382        | ,991        | ,434  | ,691        | ,407   | ,374  | ,865        | ,349      | ,516        | ,590        |
| MEP        | r                        | ,123        | -,005       | -,032       | -,046       | -,003       | ,122        | ,021  | -,124       | -,236       | -,189 | ,149        | -,147  | -,171 | ,181        | -,050     | -,039       | ,070        |
|            | p                        | ,509        | ,978        | ,866        | ,805        | ,986        | ,514        | ,913  | ,508        | ,201        | ,310  | ,423        | ,429   | ,357  | ,329        | ,791      | ,837        | ,709        |
| MBzP       | r                        | <b>,568</b> | <b>,547</b> | <b>,588</b> | ,254        | <b>,611</b> | <b>,450</b> | ,288  | <b>,439</b> | ,079        | ,127  | <b>,472</b> | ,008   | ,144  | <b>,361</b> | -,061     | <b>,385</b> | ,211        |
|            | p                        | <b>,001</b> | <b>,001</b> | <b>,000</b> | ,169        | <b>,000</b> | <b>,011</b> | ,117  | <b>,013</b> | ,672        | ,497  | <b>,007</b> | ,965   | ,438  | <b>,046</b> | ,746      | <b>,032</b> | ,255        |
| MiBP       | r                        | ,071        | ,115        | ,228        | ,243        | ,215        | -,010       | ,151  | ,103        | ,302        | ,096  | -,010       | ,183   | ,122  | ,046        | ,163      | ,314        | ,209        |
|            | p                        | ,703        | ,538        | ,217        | ,188        | ,246        | ,959        | ,416  | ,582        | ,099        | ,607  | ,958        | ,325   | ,513  | ,806        | ,382      | ,086        | ,259        |
| OH-MiBP    | r                        | ,062        | ,073        | ,194        | ,244        | ,148        | -,070       | ,239  | ,024        | ,211        | -,040 | -,010       | ,202   | -,034 | -,014       | ,156      | ,246        | ,115        |
|            | p                        | ,741        | ,696        | ,296        | ,186        | ,428        | ,708        | ,196  | ,899        | ,254        | ,830  | ,959        | ,276   | ,856  | ,939        | ,402      | ,183        | ,539        |
| MnBP       | r                        | ,083        | ,064        | ,253        | <b>,361</b> | ,240        | ,023        | ,117  | ,160        | ,328        | -,042 | -,001       | ,198   | -,013 | ,032        | ,175      | ,303        | ,207        |
|            | p                        | ,658        | ,733        | ,169        | <b>,046</b> | ,193        | ,903        | ,531  | ,391        | ,071        | ,822  | ,995        | ,285   | ,946  | ,863        | ,345      | ,098        | ,264        |
| OH-MnBP    | r                        | -,070       | -,003       | ,103        | ,199        | ,058        | -,239       | ,285  | -,138       | ,299        | ,059  | -,130       | ,280   | ,064  | -,059       | ,256      | ,276        | ,229        |
|            | p                        | ,710        | ,986        | ,580        | ,284        | ,758        | ,196        | ,120  | ,458        | ,102        | ,752  | ,487        | ,127   | ,731  | ,754        | ,165      | ,133        | ,216        |
| MEHP       | r                        | -,038       | ,006        | ,174        | ,294        | ,145        | -,018       | -,040 | ,126        | <b>,355</b> | ,042  | -,110       | ,244   | ,070  | -,115       | ,200      | <b>,410</b> | ,157        |
|            | p                        | ,840        | ,974        | ,350        | ,108        | ,436        | ,924        | ,831  | ,499        | <b>,050</b> | ,821  | ,555        | ,186   | ,710  | ,537        | ,280      | <b>,022</b> | ,399        |
| OH MEHP    | r                        | ,058        | ,137        | ,136        | ,051        | ,147        | -,017       | ,139  | ,045        | ,157        | ,200  | -,027       | ,051   | ,248  | -,046       | ,038      | ,084        | -,001       |
|            | p                        | ,758        | ,463        | ,464        | ,785        | ,430        | ,928        | ,457  | ,811        | ,400        | ,281  | ,887        | ,786   | ,179  | ,806        | ,839      | ,653        | ,996        |
| oxo MEHP   | r                        | ,088        | ,175        | ,264        | ,213        | ,239        | ,016        | ,138  | ,046        | ,338        | ,204  | ,021        | ,347   | ,209  | ,140        | ,297      | <b>,377</b> | <b>,395</b> |
|            | p                        | ,636        | ,347        | ,151        | ,251        | ,194        | ,930        | ,458  | ,805        | ,063        | ,271  | ,911        | ,056   | ,260  | ,454        | ,104      | <b>,036</b> | <b>,028</b> |
| cx- MEPP   | r                        | ,134        | ,153        | ,178        | ,098        | ,217        | ,130        | ,028  | ,181        | ,147        | ,164  | ,038        | ,042   | ,189  | ,131        | ,021      | ,220        | ,150        |
|            | p                        | ,472        | ,412        | ,337        | ,601        | ,240        | ,487        | ,883  | ,329        | ,432        | ,378  | ,838        | ,821   | ,308  | ,483        | ,911      | ,235        | ,420        |
| oxo MiNP   | r                        | ,257        | <b>,363</b> | ,264        | -,072       | ,222        | ,085        | ,336  | ,169        | -,054       | ,204  | ,247        | -,081  | ,230  | ,175        | -,137     | -,102       | -,102       |
|            | p                        | ,164        | <b>,045</b> | ,151        | ,701        | ,230        | ,648        | ,065  | ,362        | ,773        | ,271  | ,180        | ,666   | ,213  | ,347        | ,461      | ,585        | ,584        |
| cx-MiNP    | r                        | <b>,366</b> | <b>,400</b> | <b>,354</b> | ,040        | <b>,376</b> | ,216        | ,315  | ,194        | -,004       | ,205  | ,309        | -,039  | ,219  | ,266        | -,089     | ,140        | ,103        |
|            | p                        | <b>,043</b> | <b>,026</b> | <b>,051</b> | ,830        | <b>,037</b> | ,244        | ,084  | ,295        | ,984        | ,268  | ,091        | ,836   | ,236  | ,148        | ,634      | ,451        | ,580        |

**Note:** MMP, mono-methyl phthalate; MEP, mono-ethyl phthalate; MBzP, mono-benzyl phthalate; MiBP, mono-isobutyl phthalate; OH-MiBP, mono-hydroxy-iso-buthyl phthalate; MnBP, mono-n-butyl phthalate; OH-MnBP, mono-hydroxy-n-buthyl phthalate; MEHP, mono-2-ethylhexyl phthalate; OH MEHP, mono(2-ethyl-5-hydroxyhexyl) phthalate; oxo-MEHP, mono(2-ethyl-5-oxohexyl) phthalate; cx- MEPP, mono(2-ethyl-5-carboxypentyl) phthalate; oxo MiNP, mono-oxo-isononyl phthalate; cx MiNP, mono-carboxy-isononyl phthalate; BMI, Body Mass Index; HC, hip circumference; WC, waist circumference; WHR, Waist to Hip Ratio; WHtR, Waist to Height Ratio; FMI, Fat Mass Index; FFMI, Fat-Free Mass Index; VF, visceral fat; ABSI, A Body Shape Index; HI, Hip Index; z BMI, BMI adjusted for age and sex; z ABSI, ABSI adjusted for age and sex; z HI, HI adjusted for age and sex; BMI risk, the risk of premature mortality based on the Body Mass Index; ABSI risk, the risk of premature mortality based on the A Body Shape Index; HI risk, the risk of premature mortality based on the Hip Index; ARI risk, the risk of premature mortality based on the Anthropometric Risk Index; Adjusted to: physical activity; consuming meals heated in plastic containers in the microwave; consuming meals from the plastic container; drinking beverages from plastic cups or plastic bottles; using personal protective equipment (vinyl medical gloves); presence of polyvinyl chloride flooring material; using: hand cream; antiperspirant; perfume; salaams packaged in plastic material; meat products; baguette; salads; biscuits; chocolate during body lotion; nail polish; consuming: margarine; cheese and last 24 hours before sampling.
